# Supplementary material for: The Mycobacterial Cell Envelope: A Relict From the Past or the Result of Recent Evolution?
Source: Front Microbiol. 2018 Oct 9;9:2341. doi: 10.3389/fmicb.2018.02341 (PMC6194230; doi:10.3389/fmicb.2018.02341)
Supplement: Supplementary file 2 [file Table_2.xlsx]

## Sheet: Feuil1
Table S2. Matrix showing the presence (green squares) and absence (black squares) of genes involved in the biosynthesis of the cell envelope of Mycobacterium tuberculosis (for more information, see the lighter version of this table in Figure 2)
	Probable penicillin-binding protein PbpA	Probable cell division protein RodA	Probable bifunctional penicillin-binding protein 1A/1B PonA1	Probable L,D-transpeptidase LdtA	L,D-transpeptidase 4	Probable UDP-N-acetylenolpyruvoylglucosamine reductase MurB	Probable conserved lipoprotein LprQ	Probable N-succinyldiaminopimelate aminotransferase DapC	Probable UDP-N-acetylglucosamine pyrophosphorylase GlmU	Possible glycosyl hydrolase	Tetrahydrodipicolinate N-succinyltransferase DapD	Probable succinyl-diaminopimelate desuccinylase DapE	Probable amidase AmiB2	Probable UDP-N-acetylglucosamine 1-carboxyvinyltransferase MurA	Probable glutamate racemase MurI	peptidoglycan endopeptidase RipA	peptidoglycan endopeptidase RipB	Diviva family protein Wag31	Putative positive regulator of cell division	Conserved protein YfiH	Cell division protein FtsZ	Possible cell division protein FtsQ	Probable UDP-N-acetylmuramate-alanine ligase MurC	Probable UPD-N-acetylglucosamine-N-acetylmuramyl-(pentapeptide) pyrophosphoryl-undecaprenol-N-acetylglucosamine transferase MurG	FtsW-like protein FtsW	Probable UDP-N-acetylmuramoylalanine-D-glutamate ligase MurD	Probable phospho-N-acetylmuramoyl-pentappeptidetransferase MurX	Probable UDP-N-acetylmuramoylalanyl-D-glutamyl-2,6-diaminopimelate-D-alanyl-D-alanyl ligase MurF	Probable UDP-N-acetylmuramoylalanyl-D-glutamate-2,6-diaminopimelate ligase MurE	Probable penicillin-binding membrane protein PbpB	Probable conserved proline rich membrane protein	Conserved protein	Conserved protein	Probable amidase AmiA2	Probable L,D-transpeptidase LdtB	Probable diaminopimelate epimerase DapF	Probable dihydrodipicolinate synthase DapA (DHDPS) (dihydrodipicolinate synthetase)	Dihydrodipicolinate reductase DapB	Secreted L-alanine dehydrogenase Ald	Probable amidase AmiC	Probable penicillin-binding protein DacB2	Probable D-alanine--D-alanine ligase DdlA	Probable penicillin-binding protein DacB1	Probable amidase AmiD	Alanine racemase Alr	Probable phospho-sugar mutase / MrsA protein homolog	Ssd	Probable bifunctional membrane-associated penicillin-binding protein 1A/1B PonA2	Aspartate-semialdehyde dehydrogenase Asd
	pbpA	rodA	ponA1	ldtA	Rv0192	murB	lprQ	dapC	glmU	Rv1096	dapD	dapE	amiB2	murA	murI	ripA	Rv1478	wag31	Rv2147c	yfiH	ftsZ	ftsQ	murC	murG	ftsW	murD	murX	murF	murE	pbpB	ftsL	Rv2165c	Rv2166c	amiA2	ldtB	dapF	dapA	dapB	ald	amiC	dacB2	ddlA	dacB1	amiD	alr	mrsA	Rv3660c	ponA2	asd
	PG	PG	PG	PG	PG	PG	PG	PG	PG	PG	PG	PG	PG	PG	PG	PG	PG	PG	PG	PG	PG	PG	PG	PG	PG	PG	PG	PG	PG	PG	PG	PG	PG	PG	PG	PG	PG	PG	PG	PG	PG	PG	PG	PG	PG	PG	PG	PG	PG
	Rv0016c	Rv0017c	Rv0050	Rv0116c	Rv0192	Rv0482	Rv0483	Rv0858c	Rv1018c	Rv1096	Rv1201c	Rv1202	Rv1263	Rv1315	Rv1338	Rv1477	Rv1478	Rv2145c	Rv2147c	Rv2149c	Rv2150c	Rv2151c	Rv2152c	Rv2153c	Rv2154c	Rv2155c	Rv2156c	Rv2157c	Rv2158c	Rv2163c	Rv2164c	Rv2165c	Rv2166c	Rv2363	Rv2518c	Rv2726c	Rv2753c	Rv2773c	Rv2780	Rv2888c	Rv2911	Rv2981c	Rv3330	Rv3375	Rv3423c	Rv3441c	Rv3660c	Rv3682	Rv3708c
Mycobacterium tuberculosis H37Rv	1	1	1	1	1	1	1	1	1	1	1	1	1	1	1	1	1	1	1	1	1	1	1	1	1	1	1	1	1	1	1	1	1	1	1	1	1	1	1	1	1	1	1	1	1	1	1	1	1
Mycobacterium kansasii ATCC 12478	0.93	0.93	0.95	0.88	0.96	0.83	0.92	0.91	0.93	0.93	0.94	0.93	0.91	0.99	0.96	0.89	0.88	0.9	0.9	0.85	0.98	0.85	0.9	0.86	0.82	0.87	0.96	0.88	0.84	0.89	0.75	0.84	0.97	0.93	0.94	0.87	0.94	0.95	0.88	0.87	0.95	0.92	0.88	0.83	0.9	0.92	0.86	0.95	0.92
Mycobacterium marinum M	0.94	0.94	0.95	0.9	0.95	0.83	0.9	0.92	0.89	0.91	0.96	0.94	0.91	0.98	0.95	0.89	0.89	0.91	0.93	0.82	0.97	0.83	0.88	0.84	0.84	0.83	0.95	0.84	0.84	0.9	0.79	0.83	0.97	0.92	0.92	0.87	0.93	0.93	0.91	0.81	0.87	0.91	0.84	0.61	0.9	0.89	0.83	0.96	0.92
Mycobacterium gilvum PYR-GCK	0.86	0.87	0.87	0.73	0.8	0.75	0.76	0.84	0.86	0.7	0.9	0.86	0.56	0.95	0.91	0.7	0.76	0.81	0.73	0.79	0.9	0.77	0.83	0.82	0.8	0.77	0.93	0.82	0.74	0.88	0.8	0.72	0.91	0.81	0.8	0.82	0.86	0.89	0.88	0.76	0.76	0.86	0.8	0.47	0.81	0.88	0.71	0.9	0.9
Mycobacterium smegmatis MC2 155	0.88	0.87	0.86	0.73	0.82	0.78	0.78	0.84	0.85	0.48	0.83	0.87	0.57	0.95	0.91	0.7	0.79	0.85	0.71	0.83	0.94	0.81	0.85	0.84	0.76	0.76	0.93	0.84	0.75	0.84	0.56	0.74	0.93	0.83	0.82	0.83	0.85	0.92	0.9	0.76	0.8	0.87	0.8	0.53	0.79	0.86	0.71	0.9	0.91
Millisia brevis NBRC 105863	0.74	0.77	0.72	0.62	0.63	0.64	0.51	0.72	0.69	0.5	0.82	0.79	0.45	0.84	0.47	0.73	0.7	0.79	0.62	0.72	0.91	0.59	0.73	0.75	0.76	0.63	0.82	0.67	0.67	0.74	0.51	0.7	0.81	0.44	0.75	0.67	0.72	0.8	0.82	0.67	0.58	0.74	0.65	0.48	0.7	0.72	0.55	0.76	0.86
Hoyosella subflava DQS3-9A1	0.75	0.75	0.72	0.65	0.69	0.64	0.48	0.72	0.73	0	0.84	0.8	0.49	0.86	0.88	0.71	0.66	0.7	0.57	0.7	0.95	0.61	0.75	0.77	0.67	0.62	0.84	0.73	0.68	0.76	0.55	0.74	0.84	0.48	0.71	0.73	0.79	0.81	0.73	0.63	0.59	0.78	0.62	0.46	0.71	0.78	0.52	0.72	0.83
Tomitella biformata AHU 1821	0.75	0.76	0.71	0.62	0.6	0.66	0.48	0.71	0.74	0	0.78	0.81	0.56	0.83	0.87	0.68	0.69	0.77	0.6	0.72	0.92	0.55	0.73	0.77	0.7	0.67	0.84	0.69	0.66	0.68	0.61	0.73	0.87	0.71	0.72	0.69	0.82	0.81	0.47	0.63	0.58	0.77	0.63	0.46	0.68	0.77	0.56	0.71	0.81
Nocardia farcinica NCTC11134	0.75	0.8	0.72	0.69	0.7	0.7	0.73	0.74	0.72	0.5	0.78	0.77	0.45	0.85	0.42	0.65	0.65	0.74	0.56	0.76	0.95	0.63	0.76	0.77	0.78	0.63	0.81	0.73	0.68	0.78	0.6	0.73	0.88	0.47	0.79	0.71	0.77	0.82	0.79	0.61	0.62	0.8	0.65	0.51	0.72	0.77	0.56	0.78	0.89
Skermania piniformis NBRC 15059	0.76	0.78	0.72	0.59	0.51	0.66	0.48	0.75	0.72	0.44	0.79	0.8	0.56	0.86	0.43	0.68	0.67	0.71	0.67	0.71	0.78	0.63	0.77	0.74	0.7	0.67	0.82	0.7	0.71	0.78	0.57	0.73	0.87	0.68	0.72	0.7	0.78	0.82	0.48	0.6	0.58	0.78	0.68	0.46	0.72	0.75	0.6	0.76	0.88
Smaragdicoccus niigatensis DSM 44881	0.67	0.78	0.68	0.67	0.58	0.59	0.65	0.71	0.7	0	0.82	0.79	0.54	0.82	0.47	0.62	0.63	0.81	0.59	0.67	0.89	0.63	0.74	0.75	0.69	0.65	0.82	0.73	0.66	0.74	0.62	0.71	0.77	0.52	0.7	0.72	0.77	0.78	0.47	0.59	0.61	0.76	0.62	0.46	0.7	0.77	0.57	0.75	0.88
Rhodococcus erythropolis CCM2595	0.76	0.78	0.73	0.63	0.65	0.66	0.74	0.75	0.75	0.46	0.8	0.82	0.58	0.84	0.42	0.73	0.68	0.73	0.64	0.69	0.93	0.64	0.74	0.78	0.72	0.65	0.83	0.71	0.66	0.77	0.63	0.7	0.87	0.71	0.75	0.72	0.82	0.79	0.82	0.63	0.63	0.79	0.65	0.47	0.72	0.78	0.58	0.77	0.87
Gordonia bronchialis DSM 43247	0.67	0.77	0.63	0.57	0.61	0.61	0.66	0.7	0.76	0	0.78	0.77	0.46	0.86	0.88	0.72	0.66	0.79	0.53	0.74	0.91	0.58	0.7	0.73	0.75	0.65	0.83	0.5	0.66	0.75	0.59	0.68	0.81	0.44	0.71	0.68	0.76	0.79	0.81	0.61	0.6	0.58	0.64	0.47	0.66	0.74	0.57	0.7	0.86
Williamsia muralis NBRC 105860	0.7	0.79	0.7	0.6	0.65	0.66	0.65	0.72	0.75	0	0.82	0.79	0.49	0.85	0.9	0.7	0.66	0.77	0.6	0.71	0.85	0.58	0.73	0.77	0.75	0.61	0.84	0.56	0.7	0.73	0.57	0.68	0.79	0.47	0.7	0.7	0.77	0.81	0.82	0.61	0.58	0.6	0.56	0.46	0.68	0.76	0.55	0.69	0.86
Tsukamurella paurometabola DSM 20162	0.71	0.75	0.66	0.56	0.56	0.64	0.67	0.7	0.73	0.56	0.77	0.75	0.49	0.84	0.46	0.61	0.59	0.78	0.62	0.73	0.85	0.52	0.73	0.75	0.63	0.65	0.83	0.68	0.65	0.7	0.53	0.69	0.77	0.44	0.68	0.69	0.75	0.81	0.81	0.58	0.57	0.76	0.61	0.47	0.64	0.77	0.6	0.69	0.88
Corynebacterium glutamicum ATCC 13032	0.58	0.7	0.65	0.53	0.58	0.64	0.48	0.66	0.76	0	0.74	0.71	0.41	0.78	0.83	0.72	0.68	0.65	0.56	0.71	0.8	0.45	0.67	0.63	0.55	0.57	0.73	0.63	0.64	0.62	0	0.62	0.82	0.45	0.62	0.64	0.74	0.77	0	0.41	0.57	0.69	0.68	0.46	0.58	0.75	0.48	0.65	0.79
Turicella otitidis ATCC 51513	0.58	0.68	0.68	0.49	0.53	0.63	0.48	0.62	0.74	0	0.74	0.64	0.45	0.79	0.72	0.69	0.65	0.92	0.57	0.7	0.88	0.51	0.63	0.63	0.55	0.6	0.75	0.6	0.63	0.61	0	0.65	0.81	0.47	0.62	0.66	0.7	0.73	0.67	0.48	0	0.68	0	0.47	0.55	0.72	0	0.61	0.73
Lawsonella clevelandensis X1036	0.62	0.7	0.62	0.6	0.61	0.53	0.48	0.41	0.73	0	0.73	0.67	0.44	0.79	0.71	0.68	0.71	0.61	0.78	0.58	0.75	0.54	0.66	0.66	0.62	0.59	0.74	0.63	0.65	0.67	0	0.68	0.87	0.52	0.73	0.64	0.7	0.72	0.76	0.46	0	0.72	0	0.47	0.64	0.74	0	0.41	0.77
Dietzia sp. W5195	0.65	0.72	0.69	0.62	0.68	0.64	0.49	0.67	0.74	0	0.79	0.67	0.5	0.76	0.85	0.69	0.57	0.63	0.46	0.72	0.94	0.55	0.65	0.71	0.6	0.57	0.76	0.67	0.66	0.65	0.51	0.65	0.59	0.49	0.67	0.67	0.76	0.8	0.5	0.58	0.58	0.72	0.64	0.48	0.66	0.74	0	0.7	0.81
Segniliparus rotundus DSM 44985	0.62	0.67	0.46	0.7	0.61	0.61	0.63	0.68	0.67	0.56	0.78	0.74	0.47	0.83	0.71	0.72	0.56	0.66	0.63	0.61	0.86	0.61	0.73	0.66	0.67	0.6	0.78	0.65	0.63	0.72	0.57	0.7	0.8	0.46	0.67	0.64	0.72	0.71	0.49	0.44	0.76	0.67	0.61	0.46	0.64	0.7	0.55	0.68	0.78
Actinosynnema mirum DSM 43827	0.62	0.72	0.57	0.53	0.56	0.6	0.59	0.74	0.73	0.46	0.81	0.75	0.6	0.84	0.83	0.72	0.7	0.68	0.52	0.67	0.94	0.51	0.71	0.76	0.68	0.6	0.78	0.7	0.63	0.64	0.61	0.71	0.79	0.54	0.58	0.61	0.79	0.78	0.78	0.47	0.64	0.74	0.67	0.49	0.65	0.76	0.55	0.59	0.59
Amycolatopsis orientalis B-37	0.66	0.71	0.53	0.53	0.54	0.61	0.62	0.73	0.74	0.49	0.78	0.74	0.59	0.83	0.81	0.51	0.59	0.67	0.53	0.69	0.85	0.51	0.67	0.73	0.63	0.57	0.77	0.68	0.64	0.6	0.61	0.71	0.79	0.68	0.57	0.65	0.77	0.79	0.8	0.45	0.61	0.55	0.63	0.47	0.64	0.76	0.54	0.58	0.78
Saccharomonospora viridis DSM 43017	0.64	0.74	0.56	0.56	0.54	0.61	0.6	0.74	0.72	0.51	0.79	0.75	0.47	0.82	0.79	0.53	0.56	0.67	0.53	0.71	0.93	0.53	0.65	0.71	0.7	0.58	0.78	0.7	0.65	0.62	0.56	0.7	0.79	0.47	0.56	0.62	0.78	0.78	0.45	0.48	0.58	0.73	0.59	0.47	0.67	0.77	0.53	0.57	0.8
Saccharopolyspora erythraea NRRL 2338	0.64	0.74	0.55	0.52	0.55	0.63	0.59	0.73	0.69	0	0.8	0.72	0.47	0.81	0.83	0.69	0.64	0.71	0.55	0.68	0.91	0.58	0.68	0.74	0.7	0.6	0.77	0.67	0.62	0.67	0.52	0.7	0.8	0.48	0.66	0.65	0.75	0.73	0.79	0.43	0.63	0.77	0.66	0.48	0.66	0.77	0.54	0.62	0.59
Actinopolyspora halophila DSM 43834	0.63	0.69	0.54	0.52	0.56	0.61	0.62	0.72	0.71	0.5	0.79	0.7	0.48	0.81	0.79	0.55	0.54	0.67	0.58	0.69	0.93	0.51	0.67	0.72	0.7	0.55	0.77	0.66	0.62	0.6	0.48	0.68	0	0.45	0.61	0.61	0.76	0.74	0.78	0.46	0.62	0.74	0.62	0.46	0.65	0.74	0.52	0.58	0.58
Nakamurella multipartita DSM 44233	0.64	0.74	0.43	0.53	0.52	0.53	0.62	0.74	0.63	0.49	0.7	0.75	0.47	0.8	0.79	0.56	0.52	0.62	0.53	0.68	0.94	0.5	0.66	0.73	0.64	0.57	0.73	0.61	0.62	0.55	0.54	0.69	0.67	0.47	0.65	0.6	0.71	0.74	0.69	0.5	0.64	0.72	0.6	0.46	0.6	0.69	0.55	0.57	0.78
Stackebrandtia nassauensis DSM 44728	0.51	0.64	0.49	0.5	0.47	0.61	0.44	0.42	0.62	0	0.71	0.69	0.61	0.48	0.77	0.56	0.51	0.58	0.69	0	0.9	0.49	0.55	0.61	0.61	0.57	0.65	0.57	0.6	0.52	0	0.67	0.68	0.55	0.52	0.59	0.67	0.77	0.81	0.45	0	0.65	0	0.49	0.59	0.74	0.46	0.47	0.58
Micromonospora aurantiaca ATCC 27029	0.53	0.64	0.53	0.48	0.52	0.61	0.51	0.68	0.66	0.52	0.72	0.67	0.5	0.71	0	0.58	0.54	0.47	0.49	0	0.82	0.5	0.56	0.63	0.55	0.42	0.63	0.61	0.63	0.53	0	0.67	0.67	0.48	0.52	0.55	0.67	0.74	0.79	0.48	0.56	0.7	0.57	0.44	0.62	0.76	0.6	0.49	0.77
Salinispora arenicola CNS-205	0.53	0.66	0.51	0.5	0.53	0.6	0.5	0.69	0.65	0.49	0.71	0.67	0.5	0.7	0.75	0.56	0.54	0.68	0.79	0	0.91	0.49	0.58	0.64	0.57	0.41	0.64	0.6	0.61	0.51	0	0.67	0.66	0.49	0.5	0.59	0.68	0.74	0.77	0.47	0.55	0.71	0.55	0.46	0.63	0.75	0.53	0.48	0.77
Geodermatophilus obscurus DSM 43160	0.61	0.72	0.58	0.53	0.55	0.56	0.53	0.63	0.66	0.52	0.72	0.71	0.5	0.71	0	0.54	0.54	0.7	0.81	0.69	0.92	0.53	0.65	0.73	0.62	0.42	0.71	0.6	0.65	0.55	0	0.64	0.53	0.5	0.59	0.6	0.7	0.74	0.81	0.47	0.54	0.68	0.61	0.47	0.64	0.7	0.53	0.52	0.81
Acidothermus cellulolyticus 11B	0.63	0.73	0.53	0.54	0.54	0.59	0.49	0.66	0.65	0.46	0	0.7	0.54	0.72	0.74	0.61	0.55	0.48	0.82	0.54	0.9	0	0.63	0.67	0.63	0.59	0.72	0.57	0.64	0.55	0	0.64	0.63	0.5	0.59	0.53	0.68	0.72	0.73	0.47	0.6	0.62	0.55	0.47	0.63	0.72	0.46	0.46	0.79
Nocardiopsis dassonvillei DSM 43111	0.53	0.65	0.48	0.52	0.54	0.6	0.48	0.64	0.69	0.54	0	0.69	0.53	0.54	0.45	0.58	0.6	0.53	0.83	0.58	0.92	0.46	0.58	0.67	0.6	0.56	0.67	0.57	0.6	0.52	0	0.65	0.63	0.49	0.52	0.6	0.66	0.76	0.8	0.48	0	0.62	0	0.47	0.65	0.72	0.5	0.47	0.6
Thermobifida fusca YX	0.55	0.6	0.49	0.53	0.56	0.59	0.47	0.63	0.68	0.5	0	0.7	0.52	0.54	0.52	0.54	0.53	0.55	0.82	0.63	0.9	0.52	0.57	0.65	0.61	0.57	0.67	0.61	0.61	0.5	0	0.64	0.65	0.48	0.58	0.59	0.68	0.75	0.78	0.46	0	0.64	0	0.46	0.63	0.72	0.5	0.47	0.59
Streptosporangium roseum DSM 43021	0.6	0.66	0.52	0.52	0.52	0.6	0.51	0.65	0.65	0.58	0.81	0.69	0.54	0.55	0.71	0.65	0.56	0.56	0.83	0.59	0.92	0.55	0.63	0.69	0.62	0.58	0.68	0.6	0.59	0.53	0	0.66	0.6	0.49	0.53	0.61	0.71	0.79	0.78	0.46	0.56	0.66	0.58	0.5	0.6	0.72	0.51	0.48	0.59
Thermomonospora curvata DSM 43183	0.48	0.59	0.47	0.54	0.56	0.58	0.52	0.68	0.67	0.58	0	0.71	0.58	0.56	0.74	0.63	0.61	0.54	0.77	0.61	0.91	0.51	0.61	0.69	0.61	0.61	0.66	0.62	0.6	0.51	0	0.63	0.65	0.68	0.55	0.61	0.7	0.78	0.8	0.48	0.5	0.5	0.53	0.47	0.59	0.73	0.56	0.49	0.6
Kribbella flavida DSM 17836	0.58	0.65	0.49	0.52	0.49	0.58	0.56	0.68	0.67	0.55	0.73	0.7	0.48	0.72	0.75	0.54	0.51	0.52	0.79	0.58	0.83	0.49	0.64	0.69	0.63	0.59	0.66	0.61	0.64	0.49	0	0.68	0.67	0.5	0.51	0.51	0.74	0.74	0.8	0.49	0.52	0.69	0.56	0.47	0.61	0.7	0.47	0.45	0.77
Nocardioides sp. JS614	0.58	0.64	0.52	0.53	0.53	0.59	0.51	0.67	0.71	0.54	0.75	0.67	0.62	0.45	0.74	0.52	0.51	0.53	0.83	0.57	0.76	0.5	0.61	0.67	0.59	0.57	0.66	0.54	0.61	0.51	0	0.66	0.65	0.54	0.55	0.52	0.63	0.76	0.76	0.73	0	0.65	0	0.45	0.61	0.68	0.47	0.48	0.77
Propionibacterium acnes KPA171202	0.53	0.65	0.51	0.51	0.53	0.61	0.51	0.44	0.62	0.52	0.69	0.63	0.48	0.47	0.7	0.56	0.53	0	0.7	0.54	0.87	0	0.56	0.61	0.57	0.55	0.67	0.51	0.62	0.46	0	0.58	0.65	0.49	0.5	0.55	0.63	0.72	0.73	0.45	0	0.61	0	0.47	0.51	0.68	0	0.48	0.76
Catenulispora acidiphila DSM 44928	0.53	0.63	0.51	0.55	0.52	0.62	0.52	0.65	0.6	0.56	0	0.67	0.5	0.71	0.73	0.61	0.58	0.7	0.83	0.58	0.82	0	0.6	0.65	0.6	0.55	0.68	0.59	0.62	0.51	0	0.61	0.64	0.5	0.57	0.54	0.71	0.66	0.78	0.44	0.54	0.65	0.54	0.48	0.57	0.7	0.56	0.49	0.6
Streptomyces albus DSM 41398	0.55	0.65	0.48	0.55	0.5	0.6	0.46	0.68	0.69	0.5	0.76	0.69	0.47	0.49	0.47	0.57	0.46	0.72	0.82	0.63	0.88	0.49	0.61	0.7	0.56	0.57	0.66	0.64	0.62	0.48	0	0.67	0	0.48	0.56	0.54	0.7	0.76	0.8	0.64	0.5	0.65	0.5	0.47	0.62	0.72	0.51	0.48	0.77
Jiangella alkaliphila DSM 45079	0.6	0.63	0.51	0.5	0.52	0.56	0.48	0.67	0.66	0.53	0.77	0.68	0.5	0.73	0.75	0.51	0.54	0.51	0.8	0.61	0.77	0.46	0.69	0.66	0.57	0.55	0.66	0.64	0.58	0.54	0	0.63	0.66	0.48	0.52	0.51	0.67	0.73	0.8	0.49	0.57	0.67	0.6	0.46	0.6	0.73	0.5	0.46	0.61
Janibacter indicus YFY001	0.59	0.64	0.52	0.55	0.49	0.61	0.51	0.64	0.64	0	0.76	0.63	0.54	0.47	0.72	0.48	0.48	0.58	0.75	0.57	0.92	0.47	0.57	0.67	0.59	0.59	0.68	0.56	0.55	0.51	0	0.65	0.67	0.47	0.55	0.54	0.63	0.7	0.52	0.61	0	0.63	0	0.47	0.58	0.7	0	0.48	0.76
Kytococcus sedentarius DSM 20547	0.57	0.63	0.45	0	0	0.58	0	0.6	0.72	0	0	0	0.55	0.48	0.71	0	0	0	0.73	0.55	0.9	0	0.57	0.65	0.57	0.57	0.65	0.52	0.49	0.5	0	0.63	0.66	0.54	0	0	0.57	0.44	0.78	0.47	0	0.63	0	0.46	0.59	0.67	0	0.47	0.75
Arthrobacter sp. FB24	0.52	0.64	0.43	0.53	0.49	0.61	0.48	0.64	0.65	0.41	0.74	0.64	0.5	0.49	0.78	0.52	0.54	0.49	0.73	0.58	0.91	0.45	0.59	0.66	0.55	0.54	0.65	0.53	0.57	0.53	0	0.65	0.64	0.45	0.52	0.53	0.67	0.69	0.75	0.45	0	0.63	0	0.46	0.62	0.72	0.46	0.44	0.43
Micrococcus luteus NCTC 2665	0.54	0.64	0.42	0	0	0.54	0	0.58	0.66	0	0.75	0.65	0.5	0.48	0.77	0	0.57	0.44	0.71	0.5	0.9	0	0.58	0.61	0.58	0.58	0.65	0.54	0.56	0.52	0	0.62	0.64	0.43	0	0.51	0.68	0.68	0.73	0.45	0	0.6	0	0.44	0.58	0.71	0	0.44	0.41
Clavibacter michiganensis NCPPB 382	0.59	0.61	0.41	0	0	0.57	0	0.68	0.66	0	0.7	0.68	0.47	0.49	0.73	0.53	0.5	0.48	0.68	0	0.88	0.5	0.57	0.62	0.56	0.58	0.63	0.57	0.56	0.49	0	0.67	0.63	0.46	0	0.52	0.61	0.63	0.79	0.46	0	0.64	0	0.47	0.61	0.68	0	0.43	0.8
Leifsonia xyli DSM 46306	0.56	0.61	0.42	0	0	0.54	0	0.5	0.69	0	0.7	0.66	0.49	0.49	0.75	0.54	0.53	0.46	0.66	0	0.78	0	0.59	0.58	0.58	0.51	0.63	0.53	0.53	0.48	0	0.62	0.64	0.45	0	0.5	0.62	0.63	0.72	0.45	0	0.61	0	0.46	0.6	0.7	0	0.45	0.78
Kineococcus radiotolerans SRS30216	0.57	0.66	0.52	0.58	0.54	0.61	0.49	0.68	0.72	0	0.75	0.65	0.52	0.47	0.76	0.57	0.59	0	0.77	0.62	0.91	0.49	0.63	0.63	0.56	0.55	0.66	0.63	0.59	0.48	0	0.66	0.61	0.44	0.52	0.48	0.7	0.71	0.78	0.48	0	0.65	0	0.47	0.61	0.71	0.53	0.46	0.6
Brevibacterium linens BS258	0.55	0.64	0.5	0.48	0.47	0.55	0.62	0.54	0.7	0.47	0.76	0.63	0.45	0.69	0.46	0.55	0.57	0.59	0.74	0.56	0.87	0.45	0.62	0.55	0.58	0.56	0.67	0.55	0.55	0.46	0	0.62	0.61	0.45	0.47	0.51	0.69	0.69	0.77	0.42	0.48	0.62	0.47	0.7	0.52	0.65	0.5	0.48	0.78
Cellulomonas flavigena DSM 20109	0.58	0.62	0.48	0	0	0.61	0	0.72	0.68	0.56	0.72	0.7	0.52	0.51	0.76	0.54	0.51	0.44	0.82	0.61	0.9	0.47	0.58	0.63	0.59	0.53	0.66	0.58	0.59	0.53	0	0.68	0.61	0.46	0	0.52	0.66	0.71	0.78	0.46	0	0.65	0	0.46	0.64	0.71	0	0.45	0.79
Jonesia denitrificans DSM 20603	0.58	0.65	0.51	0	0	0.49	0	0.45	0.66	0.5	0.77	0.64	0.45	0.5	0.72	0.51	0.53	0.41	0.78	0.48	0.86	0.48	0.54	0.63	0.56	0.51	0.66	0.56	0.53	0.49	0	0.66	0.64	0.45	0	0.51	0.66	0.72	0.74	0.45	0	0.64	0	0.46	0.58	0.66	0.41	0.49	0.78
Actinomyces odontolyticus ATCC 17982	0.55	0.6	0.48	0	0	0.58	0	0.49	0.64	0	0.73	0.6	0.54	0.49	0.7	0.55	0.49	0.46	0.72	0.53	0.85	0.47	0.55	0.55	0.5	0.53	0.65	0.54	0.55	0.46	0	0.65	0.67	0.46	0	0.46	0.66	0.68	0	0.41	0	0.61	0	0.47	0.53	0.68	0	0.48	0.77
Mobiluncus curtisii ATCC 43063	0.56	0.58	0.51	0	0	0.56	0	0.47	0.64	0.43	0.56	0	0.45	0.5	0.7	0.54	0.52	0.47	0.73	0	0.81	0.42	0.54	0.51	0.54	0.48	0.66	0.52	0.57	0.51	0	0.65	0.62	0.46	0	0	0	0	0.46	0.42	0	0.6	0	0.45	0.5	0.64	0	0.46	0.77
Actinomyces urogenitalis DSM 15434	0.58	0.68	0.52	0	0	0.55	0	0.49	0.63	0	0.68	0.57	0.43	0.48	0.71	0.6	0.52	0.45	0.67	0.49	0.87	0.48	0.59	0.55	0.55	0.49	0.65	0.5	0.54	0.48	0	0.64	0.68	0.52	0	0.47	0.63	0.68	0	0.44	0	0.62	0	0.45	0.52	0.68	0	0.48	0.76
Arcanobacterium haemolyticum DSM 20595	0.55	0.58	0.49	0	0	0.55	0	0.48	0.58	0	0	0	0.52	0.49	0.68	0.52	0.47	0.46	0.61	0.52	0.72	0	0.57	0.56	0.5	0.52	0.65	0.54	0.56	0.47	0	0.66	0.67	0.51	0	0	0.46	0	0.5	0.46	0	0.61	0	0.44	0.57	0.67	0	0.46	0
Bifidobacterium longum ATCC 15697	0.55	0.63	0.48	0	0	0.5	0	0.47	0.6	0	0.62	0.56	0.43	0.5	0.49	0	0	0	0.72	0.48	0.78	0	0.5	0.6	0.52	0.49	0.62	0.53	0.44	0.47	0	0.6	0.57	0.53	0	0.5	0.65	0.72	0.44	0.46	0	0.58	0	0.46	0.52	0.64	0	0.46	0.41
Gardnerella vaginalis ATCC 14019	0.56	0.59	0.48	0	0	0.48	0	0.49	0.59	0	0	0	0.47	0.5	0.53	0.56	0.52	0	0.73	0.43	0.69	0	0.53	0.56	0.53	0.49	0.63	0.49	0.42	0.5	0	0.56	0.56	0.52	0	0	0.48	0	0	0.41	0	0.59	0	0.48	0.53	0.64	0	0.48	0.74
Frankia alni ACN14a	0.61	0.69	0.53	0.55	0.54	0	0.47	0.56	0.67	0.49	0	0.71	0.56	0.73	0.77	0.58	0.51	0.41	0.75	0.58	0.9	0	0.54	0.68	0.64	0.59	0.71	0.58	0.64	0.53	0	0.68	0.65	0.65	0.52	0.59	0.69	0.75	0	0.47	0.53	0.67	0.55	0.49	0.59	0.71	0.42	0.49	0.6
Euzebya tangerina F10	0.55	0.65	0.47	0	0	0.38	0	0.65	0.6	0	0.68	0.5	0.45	0.52	0.66	0	0	0	0.57	0.55	0.88	0	0.57	0.52	0.55	0.47	0.64	0.51	0.57	0.54	0	0.57	0.5	0.46	0	0.48	0.59	0.66	0.66	0.58	0.46	0.61	0.42	0.48	0.53	0.65	0	0.46	0.66
Nitriliruptor alkaliphilus DSM 45188	0.56	0.62	0.49	0	0	0	0	0.62	0.6	0	0.65	0.47	0.51	0.66	0	0.57	0.5	0	0.62	0.5	0.89	0.43	0.6	0.55	0.62	0.4	0.62	0.51	0.53	0.53	0	0.58	0.59	0.47	0	0.47	0.6	0.62	0.68	0.46	0.48	0.6	0.49	0.45	0.56	0.66	0	0.41	0.6
Acidimicrobium ferrooxidans DSM 10331	0.52	0.63	0	0	0	0.39	0	0.61	0.55	0.5	0	0.54	0.49	0.61	0.55	0.6	0.52	0	0.64	0.5	0.87	0	0.57	0.45	0.51	0.46	0.59	0.43	0.58	0.45	0	0.51	0.48	0.48	0	0.47	0.59	0.54	0.65	0.46	0.5	0.44	0	0.47	0.51	0.58	0	0	0.7
Conexibacter woesei DSM 14684	0.49	0.6	0.49	0	0	0.54	0	0.44	0.64	0.52	0	0.42	0.67	0.51	0.57	0	0	0	0.46	0.49	0.75	0	0.54	0.47	0.55	0.44	0.57	0.53	0.56	0.51	0	0.56	0.48	0.68	0	0.42	0.54	0.6	0.71	0.52	0.47	0.56	0.48	0.47	0.51	0.59	0	0.44	0.65
Thermoleophilum album ATCC 35263	0.48	0.52	0.46	0	0	0	0	0.44	0.58	0.41	0	0	0.59	0.52	0	0	0	0	0.7	0.48	0.82	0	0.53	0.51	0.57	0.42	0.55	0.47	0.57	0.48	0	0.59	0.48	0.58	0	0.44	0.59	0.58	0.44	0.5	0.51	0.55	0.47	0.46	0.52	0.54	0	0.46	0.63
Gaiella sp. SCGC AG-212-M14	0.41	0.49	0.48	0	0	0.41	0	0.39	0.55	0.52	0	0	0.44	0	0	0.59	0.54	0	0	0	0.85	0	0.47	0.51	0.54	0.46	0	0	0	0	0	0	0	0.46	0	0	0	0	0	0.49	0	0	0	0.48	0	0	0	0.44	0
Rubrobacter radiotolerans RSPS-4	0.49	0.58	0.49	0	0	0.43	0	0.48	0.62	0.45	0	0.52	0.48	0.61	0.58	0.48	0.56	0	0.72	0.45	0.83	0	0.55	0.49	0.49	0.46	0.55	0.48	0.53	0.46	0	0.54	0.47	0.48	0	0.49	0.54	0.46	0.68	0.42	0.49	0.57	0.51	0.47	0.52	0.59	0	0.45	0.51
Atopobium parvulum DSM 20469	0.48	0.57	0.48	0	0	0.41	0	0.48	0.59	0	0	0.43	0	0.66	0.51	0	0	0.55	0.62	0.43	0.74	0	0.56	0.48	0.53	0.45	0.58	0.47	0.47	0.48	0	0.55	0	0	0	0	0.57	0.49	0	0	0.47	0.49	0.54	0	0.49	0.58	0	0.44	0.54
Olsenella uli DSM 7084	0.48	0.6	0.49	0	0	0.41	0	0.48	0.58	0.5	0	0	0.53	0.64	0.54	0	0	0	0	0.51	0.82	0	0.55	0.48	0.56	0.46	0.57	0.47	0.46	0.49	0	0.55	0	0.55	0	0	0.43	0	0	0.4	0.46	0.54	0.51	0.45	0.46	0.57	0	0.46	0.58
Cryptobacterium curtum DSM 15641	0.46	0.59	0.49	0	0	0.42	0	0.47	0.57	0.52	0	0	0.43	0.65	0.53	0.48	0	0	0	0.46	0.79	0.45	0.55	0.52	0.52	0.42	0.58	0.48	0.54	0.45	0	0.59	0.5	0.5	0	0	0.55	0.6	0	0.39	0.44	0.5	0.46	0.46	0.51	0.62	0	0.47	0.59
Eggerthella lenta DSM 2243	0.49	0.6	0.47	0	0	0.41	0	0.47	0.61	0.52	0	0	0.44	0.65	0.57	0.53	0.53	0	0	0.44	0.71	0	0.55	0.51	0.5	0.43	0.58	0.48	0.54	0.44	0	0.57	0.52	0.54	0	0	0.56	0.61	0	0.41	0.42	0.52	0.44	0.47	0.54	0.61	0	0.46	0.58
Slackia heliotrinireducens DSM 20476	0.45	0.56	0.48	0	0	0.41	0	0.48	0.59	0.47	0	0	0.45	0.64	0.55	0.52	0.5	0	0	0.45	0.78	0	0.56	0.49	0.53	0.43	0.56	0.53	0.5	0.5	0	0.57	0.49	0.44	0	0	0.54	0	0.46	0.43	0.44	0.49	0	0.46	0.51	0.61	0	0.47	0.58
Clostridium novyi NT	0.47	0.56	0.39	0	0	0.38	0	0.5	0.59	0.45	0	0	0.54	0.61	0.57	0.52	0	0	0.63	0.48	0.79	0	0.52	0.48	0.52	0.43	0.55	0.42	0.56	0.46	0	0.56	0	0.53	0	0.43	0.55	0.47	0	0.53	0.52	0.57	0.48	0.49	0.53	0.63	0	0.39	0.56
Bacillus subtilis 168	0.44	0.51	0.47	0	0	0.42	0	0.48	0.6	0.54	0	0	0.47	0.64	0.59	0.51	0.56	0	0.55	0.48	0.75	0	0.45	0.47	0.55	0.46	0.58	0.44	0.56	0.47	0	0.57	0.56	0.45	0	0.42	0.6	0.66	0.67	0.42	0.52	0.58	0.54	0.5	0.59	0.61	0	0.41	0.57
[truncated: 133 more columns]
